# Supplementary material
Source: PubMed Central journal article supplement (PMC4508276)

**S1: Characterization of HSC cell development on ESU-8 (12- $\mu\text{m}$  pore) scaffolds.** (a) F-actin staining revealing fiber alignment of the HSC cells on the Extracel-coated SU-8 scaffold (ESU-8). (b) HSC cells cultured on the ESU-8 scaffold regained expression of cell characteristic marker, CD31, an expression that is lost in 2D culture on glass coverslips. (c) HSC cells cultured on the ESU-8 scaffold exhibited proper expression and distribution of cell characteristic marker, VE-cadherin, when compared to 2D culture on glass coverslip. (d) HSC cells cultured on the ESU-8 scaffold maintained expression of cell characteristic marker, fibulin 2. (a-d) Scale bar = 100  $\mu\text{m}$ . (e) SEM images revealing formation of vacuole-like micron-sized pores in the engineered SC inner wall following perfusion at 4  $\mu\text{l}/\text{min}$  for 6 hours.

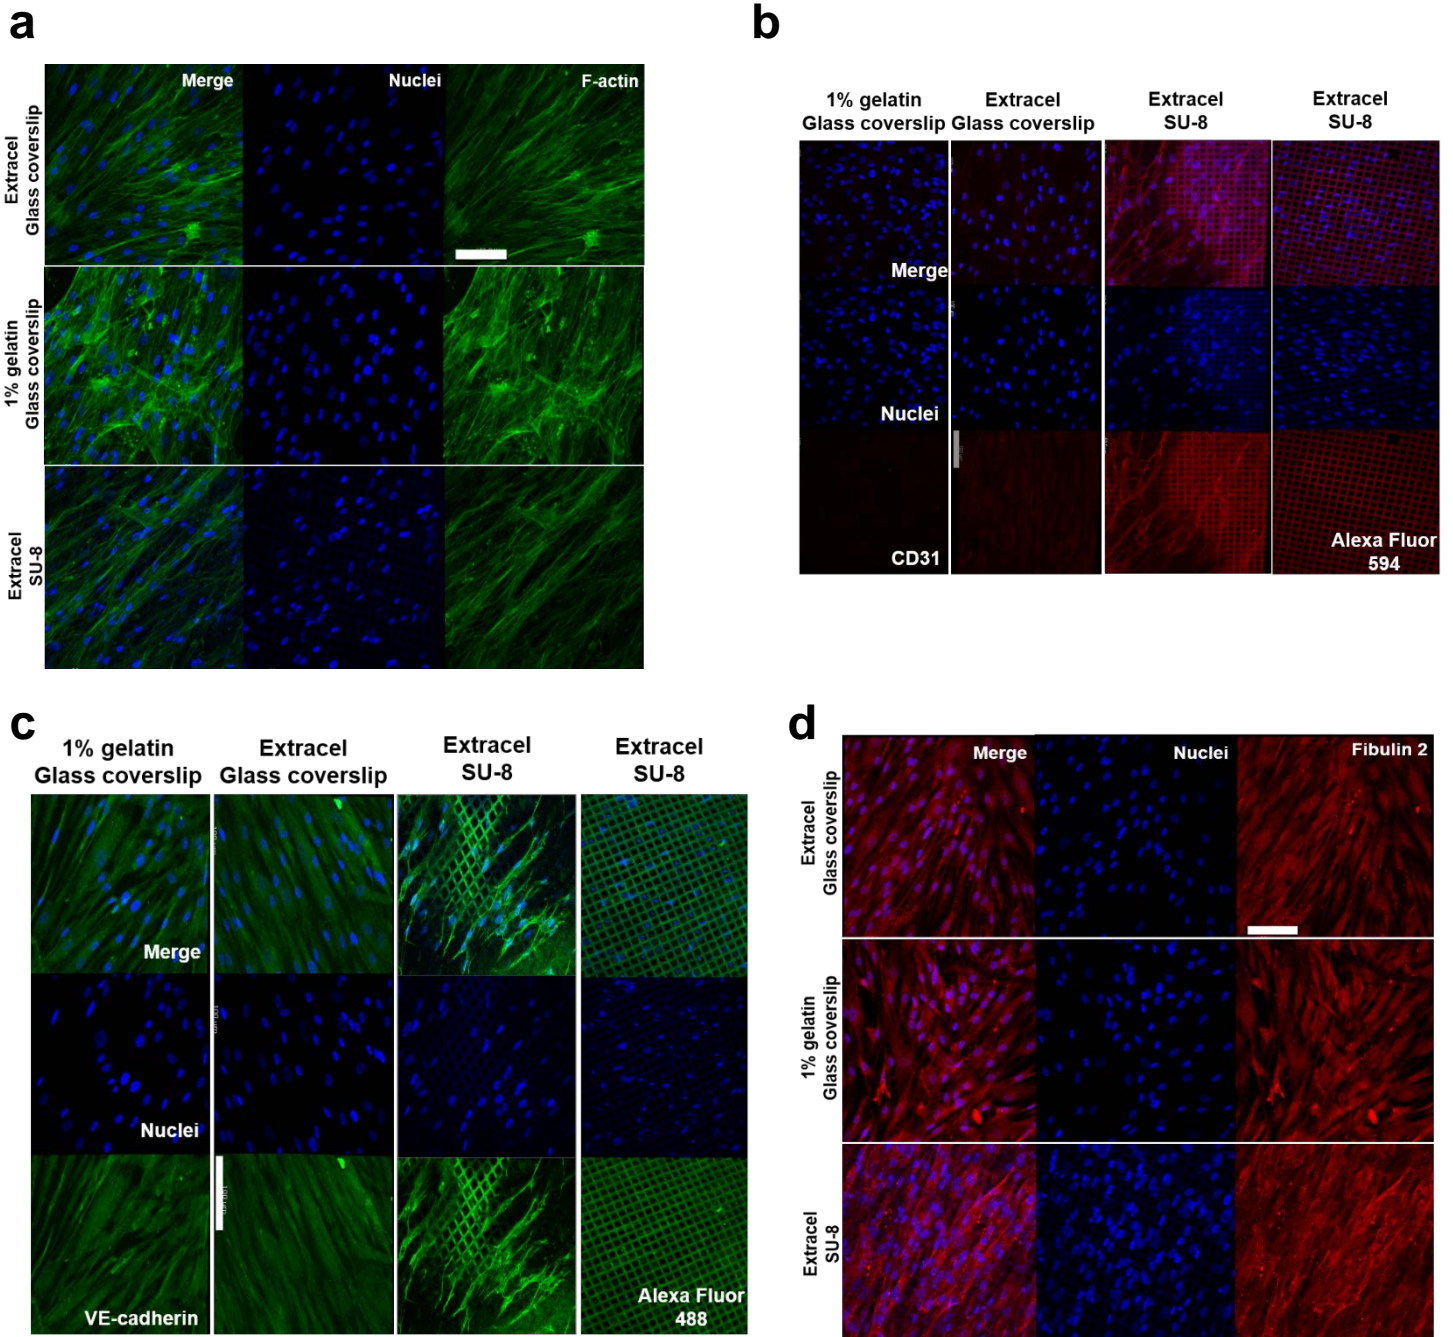

**e**

**Perfused at 4  $\mu$ l/min**

**No perfusion**

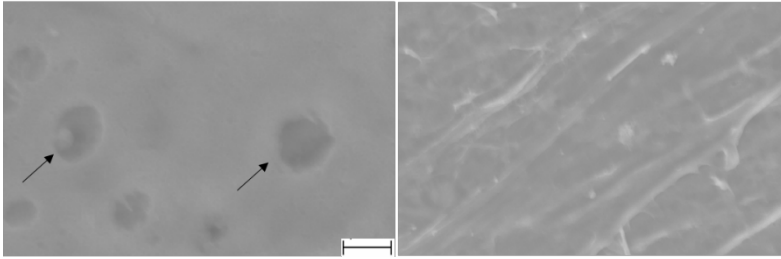

**S2: Evaluation of the engineered Schlemm's canal inner wall as a model for drug.**

(a, b) Confocal images of engineered SC layer revealing induced fibronectin expression (a) and increased stress fiber formation after treated with 1.4 and 2.5 ng/ml TGF- $\beta$ 2. Scale bar = 100  $\mu$ m. (c) Gene expression of the engineered SC layer after treated with 2.5 ng/ml TGF- $\beta$ 2 revealing down-regulated VE-cadherin by immunocytochemistry. Scale bar = 100  $\mu$ m (d) immunohistochemistry demonstrating a less than 1% transfection efficiency in the primary HSC cells 72 hours post-transfection with GFP. Scale bar= 400 nm

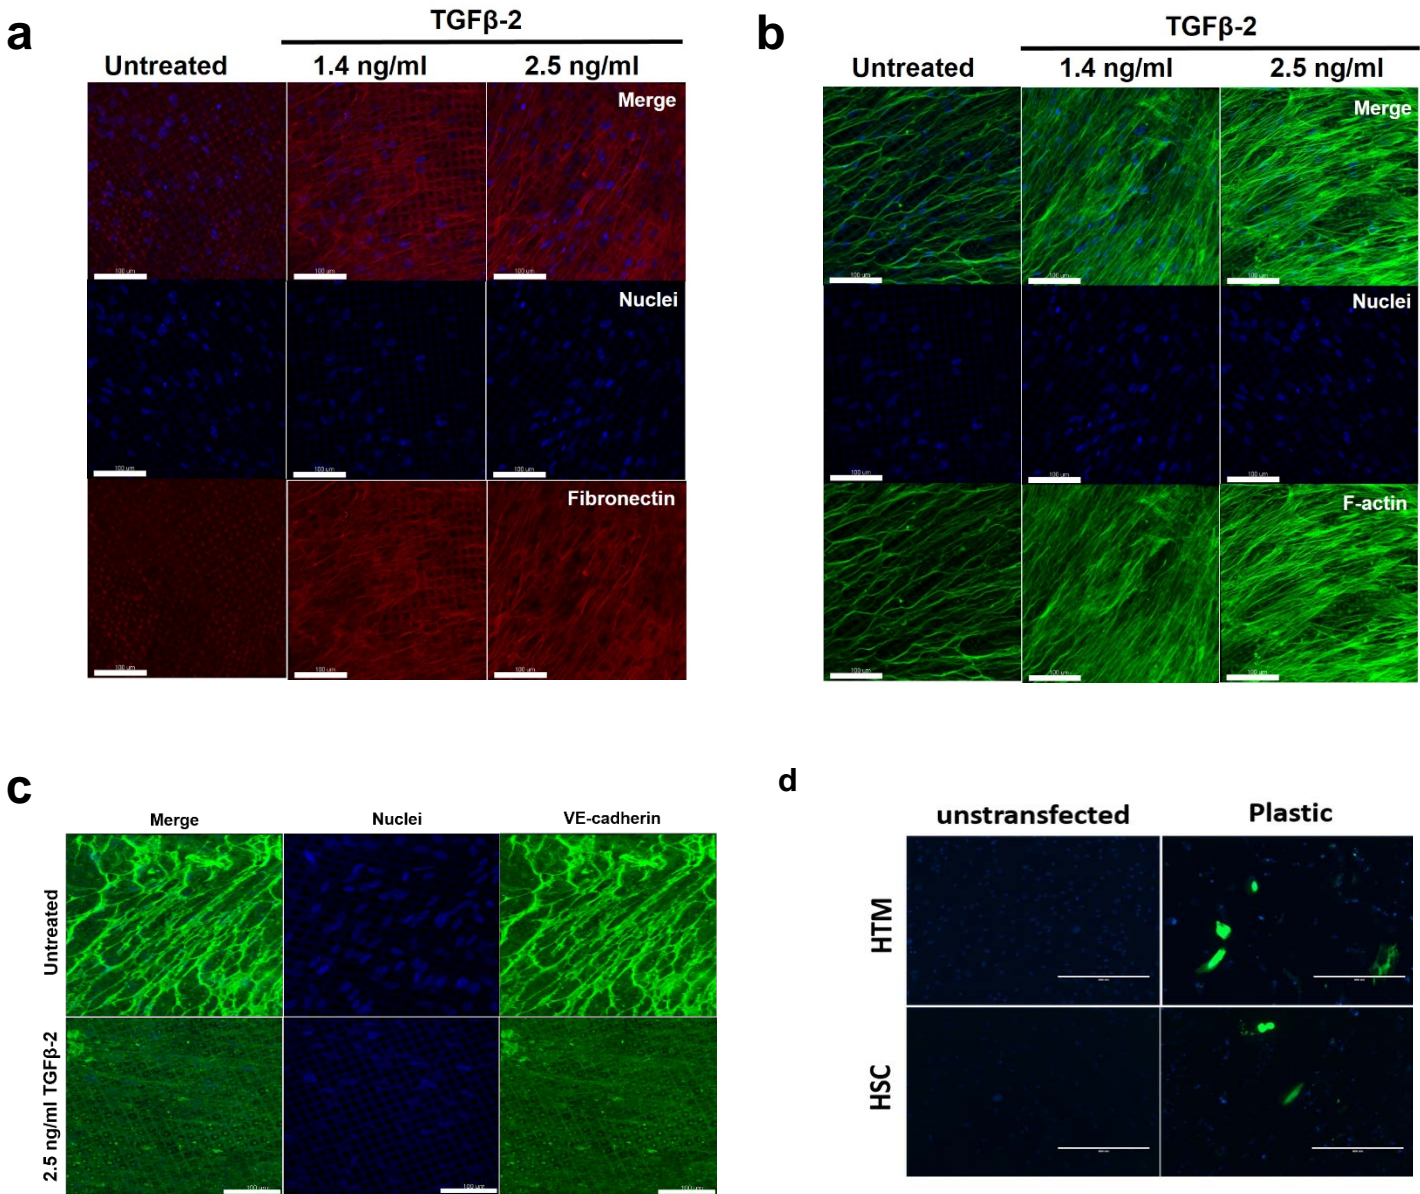

Supplement: NIHMS705467-supplement.pdf [file NIHMS705467-supplement.pdf]
